# Supplementary material for: MStractor: R Workflow Package for Enhancing Metabolomics Data Pre-Processing and Visualization
Source: MDPI journal article supplement (doi:10.3390/metabo11080492), 2021-07-29

## Supplementary Information

Table S1: Extract of the MStractor workflow result table ('PksBpsCurated')

| Id   | mz       | mzmin    | mzmax    | rt    | rtmin | rtmax | npeaks | Mix | Treatment1 | ms_level | Mix_R1 | Mix_R2 | Mix_R3 | Treatment1_R1 | Treatment1_R2 | Treatment1_R3 | isotopes  | adduct | pcgroup | RespMed  |
|------|----------|----------|----------|-------|-------|-------|--------|-----|------------|----------|--------|--------|--------|---------------|---------------|---------------|-----------|--------|---------|----------|
| 184  | 248.9607 | 248.9606 | 248.9608 | 14.1  | 13.5  | 14.6  | 6      | 3   | 3          | 1        | 79514  | 76798  | 74180  | 79184         | 76473         | 76738         | [13][M]-  |        | 47      | 76768    |
| 216  | 272.9591 | 272.9588 | 272.9595 | 90.4  | 89.5  | 90.6  | 6      | 3   | 3          | 1        | 12465  | 11566  | 11666  | 6607          | 5014          | 9258          |           |        | 199     | 10412    |
| 183  | 248.9606 | 248.9603 | 249.0416 | 94.5  | 93.5  | 103.5 | 7      | 3   | 3          | 1        | 14081  | 13294  | 13320  | 16880         | 15490         | 10346         |           |        | 164     | 13700.5  |
| 83   | 197.808  | 197.8076 | 197.8083 | 102.4 | 102.2 | 102.5 | 3      | 1   | 2          | 1        | 8464   | 8472   | 8605   | 11400         | 4956          | 890           |           |        | 217     | 8468     |
| 19   | 149.0097 | 149.0093 | 149.01   | 106.5 | 105.5 | 106.6 | 6      | 3   | 3          | 1        | 6462   | 6663   | 6606   | 3189          | 3871          | 16758         |           |        | 166     | 6534     |
| 64   | 187.0423 | 187.0415 | 187.0427 | 124.6 | 123.5 | 124.6 | 6      | 3   | 3          | 1        | 5190   | 4543   | 4949   | 2688          | 3648          | 12726         |           |        | 193     | 4746     |
| 8    | 117.0195 | 117.0191 | 117.0199 | 153.9 | 152.8 | 154.7 | 4      | 2   | 2          | 1        | 2436   | 2955   | 2647   | 1989          | 2173          | 4911          |           |        | 298     | 2541.5   |
| 9    | 125.0248 | 125.0247 | 125.0251 | 215.1 | 211.4 | 261.0 | 5      | 2   | 3          | 1        | 3241   | 3065   | 9727   | 5217          | 8964          | 5328          |           |        | 766     | 5272.5   |
| 554  | 385.0236 | 385.0229 | 385.0243 | 220.9 | 220.5 | 221.4 | 6      | 3   | 3          | 1        | 17005  | 16492  | 16618  | 18987         | 25105         | 34520         | [40][M]-  |        | 91      | 17996    |
| 33   | 169.0146 | 169.0143 | 169.015  | 261.1 | 260.5 | 261.4 | 6      | 3   | 3          | 1        | 219586 | 202016 | 204388 | 215307        | 208555        | 213596        | [4][M]-   |        | 14      | 211075.5 |
| 1576 | 689.0824 | 689.0815 | 689.0836 | 271.4 | 271.0 | 272.8 | 6      | 3   | 3          | 1        | 51372  | 46741  | 48856  | 56926         | 53127         | 54888         | [134][M]- |        | 62      | 52249.5  |
| 973  | 495.1138 | 495.1129 | 495.1147 | 278.3 | 277.2 | 279.4 | 2      | 1   | 1          | 1        | 4032   | 3677   | 3843   | 2120          | 2177          | 2400          |           |        | 373     | 3038.5   |
| 1517 | 673.0876 | 673.0872 | 673.0881 | 293.4 | 293.1 | 294.9 | 6      | 3   | 3          | 1        | 101222 | 94086  | 95145  | 107601        | 95512         | 91835         | [128][M]- |        | 37      | 95328.5  |
| 505  | 369.0289 | 369.028  | 369.0293 | 313.0 | 311.4 | 313.5 | 6      | 3   | 3          | 1        | 215345 | 195878 | 203339 | 306884        | 308352        | 363012        | [35][M]-  |        | 7       | 261114.5 |
| 54   | 183.0304 | 183.0302 | 183.0309 | 329.3 | 328.5 | 329.6 | 6      | 3   | 3          | 1        | 37352  | 33962  | 35811  | 38963         | 38768         | 38393         | [5][M]-   |        | 82      | 37872.5  |
| 501  | 368.0983 | 368.0977 | 368.0987 | 344.8 | 343.4 | 345.7 | 4      | 3   | 1          | 1        | 3761   | 3418   | 3428   | 4922          | 5955          | 6749          |           |        | 313     | 4341.5   |
| 970  | 495.1134 | 495.1129 | 495.1142 | 369.7 | 369.3 | 371.1 | 6      | 3   | 3          | 1        | 7748   | 7246   | 7192   | 2736          | 2607          | 3111          |           |        | 281     | 5151.5   |
| 698  | 424.0263 | 424.0263 | 424.0263 | 415.9 | 415.9 | 415.9 | 1      | 0   | 1          | 1        | 1832   | 1330   | 1421   | 2304          | 2458          | 3265          |           |        | 491     | 2068     |
| 23   | 153.0561 | 153.0558 | 153.0566 | 428.1 | 427.4 | 429.5 | 5      | 2   | 3          | 1        | 15861  | 15498  | 15594  | 20494         | 19506         | 18731         |           |        | 139     | 17296    |
| 1931 | 867.2059 | 867.2059 | 867.2059 | 449.6 | 449.6 | 449.6 | 1      | 0   | 1          | 1        | 12540  | 10849  | 10976  | 7852          | 7119          | 7272          | [181][M]- |        | 198     | 9350.5   |
| 1519 | 673.0874 | 673.0866 | 673.0907 | 455.2 | 443.4 | 456.2 | 4      | 3   | 1          | 1        | 87351  | 81061  | 11476  | 83448         | 78534         | 72630         | [129][M]- |        | 45      | 79797.5  |
| 22   | 153.0199 | 153.0197 | 153.0204 | 479.9 | 479.4 | 480.4 | 6      | 3   | 3          | 1        | 36145  | 34251  | 32711  | 32759         | 30826         | 34714         | [2][M]-   |        | 86      | 33505    |
| 688  | 421.1037 | 421.1032 | 421.1052 | 488.4 | 487.7 | 489.5 | 5      | 3   | 2          | 1        | 20362  | 18163  | 17641  | 7936          | 7631          | 9261          |           |        | 141     | 13451    |
| 37   | 175.0617 | 175.0614 | 175.0625 | 516.1 | 515.4 | 516.5 | 6      | 3   | 3          | 1        | 164033 | 159497 | 160827 | 131861        | 145864        | 194632        |           |        | 17      | 160162   |
| 39   | 176.0649 | 176.0649 | 176.0649 | 516.4 | 516.4 | 516.4 | 1      | 1   | 0          | 1        | 13512  | 12681  | 12616  | 11135         | 12368         | 15819         |           |        | 634     | 12648.5  |
| 1460 | 657.0926 | 657.0916 | 657.0943 | 524.4 | 522.4 | 525.6 | 6      | 3   | 3          | 1        | 426497 | 394609 | 402076 | 535640        | 510217        | 452758        | [121][M]- |        | 3       | 439627.5 |
| 2125 | 973.2024 | 973.2007 | 973.207  | 528.4 | 527.8 | 530.5 | 5      | 2   | 3          | 1        | 8015   | 7031   | 7177   | 2420          | 2652          | 2733          |           |        | 635     | 4882     |

**Id**: identifier assigned in the MStractor workflow; **mz**: accurate mass to charge ratio, **mzmin**: minimum m/z observed for the feature across the dataset, **mzmax**: max m/z observed for the feature across the dataset  
**rt**: retention time expressed in minutes, **rtmin**: minimum rt observed for the feature across the dataset, **rtmax**: maximum rt observed for the feature across the dataset, **npeaks**: number of peaks observed for a given feature in the dataset, **isotopes**: isotopes found in the pseudospectrum, **adducts**: adducts presents, **pcgroup**: id of the pseudospectra groups, **RespMed**: average response across the dataset. **Mix\_R1**, **Mix\_R2**, **Mix\_R3**, **Treatment1\_R1**, **Treatment1\_R2**, **Treatment1\_R3**: instrumental response detected in the samples.

## Supplementary Information

Table S2: Extract of the MStractor workflow result table (Median normalized data table)

| Id   | mz       | rt   | Mix_R1 | Mix_R2 | Mix_R3 | Treatment1_R1 | Treatment1_R2 | Treatment1_R3 |
|------|----------|------|--------|--------|--------|---------------|---------------|---------------|
| 184  | 248.9607 | 0.23 | 8.04   | 8.82   | 8.24   | 9.77          | 9.95          | 8.55          |
| 216  | 272.9591 | 1.51 | 1.26   | 1.33   | 1.30   | 0.82          | 0.65          | 1.03          |
| 183  | 248.9606 | 1.58 | 1.42   | 1.53   | 1.48   | 2.08          | 2.01          | 1.15          |
| 83   | 197.808  | 1.71 | 0.86   | 0.97   | 0.96   | 1.41          | 0.64          | 0.10          |
| 19   | 149.0097 | 1.78 | 0.65   | 0.77   | 0.73   | 0.39          | 0.50          | 1.87          |
| 64   | 187.0423 | 2.08 | 0.53   | 0.52   | 0.55   | 0.33          | 0.47          | 1.42          |
| 8    | 117.0195 | 2.57 | 0.25   | 0.34   | 0.29   | 0.25          | 0.28          | 0.55          |
| 9    | 125.0248 | 3.58 | 0.33   | 0.35   | 1.08   | 0.64          | 1.17          | 0.59          |
| 554  | 385.0236 | 3.68 | 1.72   | 1.89   | 1.85   | 2.34          | 3.27          | 3.85          |
| 33   | 169.0146 | 4.35 | 22.22  | 23.21  | 22.71  | 26.57         | 27.13         | 23.81         |
| 1576 | 689.0824 | 4.52 | 5.20   | 5.37   | 5.43   | 7.02          | 6.91          | 6.12          |
| 973  | 495.1138 | 4.64 | 0.41   | 0.42   | 0.43   | 0.26          | 0.28          | 0.27          |
| 1517 | 673.0876 | 4.89 | 10.24  | 10.81  | 10.57  | 13.28         | 12.42         | 10.24         |
| 505  | 369.0289 | 5.22 | 21.79  | 22.50  | 22.59  | 37.87         | 40.11         | 40.47         |
| 54   | 183.0304 | 5.49 | 3.78   | 3.90   | 3.98   | 4.81          | 5.04          | 4.28          |
| 501  | 368.0983 | 5.75 | 0.38   | 0.39   | 0.38   | 0.61          | 0.77          | 0.75          |
| 970  | 495.1134 | 6.16 | 0.78   | 0.83   | 0.80   | 0.34          | 0.34          | 0.35          |
| 698  | 424.0263 | 6.93 | 0.19   | 0.15   | 0.16   | 0.28          | 0.32          | 0.36          |
| 23   | 153.0561 | 7.13 | 1.60   | 1.78   | 1.73   | 2.53          | 2.54          | 2.09          |
| 1931 | 867.2059 | 7.49 | 1.27   | 1.25   | 1.22   | 0.97          | 0.93          | 0.81          |
| 1519 | 673.0874 | 7.59 | 8.84   | 9.31   | 1.28   | 10.30         | 10.22         | 8.10          |
| 22   | 153.0199 | 8    | 3.66   | 3.94   | 3.63   | 4.04          | 4.01          | 3.87          |
| 688  | 421.1037 | 8.14 | 2.06   | 2.09   | 1.96   | 0.98          | 0.99          | 1.03          |
| 37   | 175.0617 | 8.6  | 16.59  | 18.32  | 17.87  | 16.27         | 18.97         | 21.70         |
| 39   | 176.0649 | 8.61 | 1.37   | 1.46   | 1.40   | 1.37          | 1.61          | 1.76          |
| 1460 | 657.0926 | 8.74 | 43.15  | 45.34  | 44.68  | 66.10         | 66.37         | 50.47         |
| 2125 | 973.2024 | 8.81 | 0.81   | 0.81   | 0.80   | 0.30          | 0.34          | 0.30          |

**Id:** Feature identifier assigned in the MStractor workflow; **mz:** accurate mass to charge ratio **rt:** retention time expressed in minutes.

**Mix\_R1, Mix\_R2, Mix\_R3, Treatment1\_R1, Treatment1\_R2, Treatment1\_R3:** median normalized instrumental response detected in the samples.

## Supplementary Information

Table S3: Extract of the MStractor descriptive statistics table (MIX)

| mz       | rt     | Mix_R1 | Mix_R2 | Mix_R3 | Average.Mix | St.Dev.Mix | CV.Mix |
|----------|--------|--------|--------|--------|-------------|------------|--------|
| 509.0745 | 106.02 | 0.24   | 0.23   | 0.26   | 0.24        | 0.01       | 5.50   |
| 739.2242 | 111.41 | 0.81   | 0.83   | 0.82   | 0.82        | 0.01       | 1.07   |
| 315.0518 | 116    | 39.91  | 37.98  | 38.30  | 38.73       | 1.03       | 2.67   |
| 528.3041 | 98.67  | 0.28   | 0.26   | 0.28   | 0.27        | 0.01       | 4.24   |
| 169.0146 | 4.35   | 22.22  | 23.21  | 22.71  | 22.71       | 0.50       | 2.19   |
| 317.0315 | 104.64 | 34.00  | 34.59  | 37.08  | 35.23       | 1.64       | 4.65   |
| 319.1309 | 89.91  | 0.25   | 0.27   | 0.26   | 0.26        | 0.01       | 4.98   |
| 321.1738 | 129.44 | 3.15   | 3.02   | 3.04   | 3.07        | 0.07       | 2.21   |
| 323.0785 | 101.78 | 0.79   | 0.82   | 0.83   | 0.81        | 0.02       | 2.32   |
| 325.0586 | 47.45  | 3.25   | 3.32   | 3.37   | 3.31        | 0.06       | 1.77   |
| 325.0911 | 35.4   | 3.71   | 3.93   | 3.89   | 3.84        | 0.12       | 3.06   |
| 326.0613 | 46.71  | 0.96   | 1.00   | 1.02   | 0.99        | 0.03       | 3.31   |
| 741.2223 | 99.13  | 0.18   | 0.18   | 0.19   | 0.18        | 0.00       | 2.63   |
| 175.0617 | 8.6    | 16.59  | 18.32  | 17.87  | 17.60       | 0.90       | 5.10   |
| 326.1723 | 88.31  | 0.32   | 0.32   | 0.30   | 0.31        | 0.01       | 4.16   |
| 509.129  | 11.07  | 0.88   | 0.86   | 0.87   | 0.87        | 0.01       | 0.91   |
| 531.0754 | 86.71  | 0.33   | 0.33   | 0.34   | 0.33        | 0.01       | 2.92   |
| 175.0617 | 10.02  | 5.45   | 6.08   | 5.73   | 5.75        | 0.32       | 5.49   |
| 176.0649 | 8.61   | 1.37   | 1.46   | 1.40   | 1.41        | 0.05       | 3.22   |
| 328.2218 | 111.02 | 1.17   | 1.21   | 1.22   | 1.20        | 0.03       | 2.27   |
| 329.2343 | 113.83 | 12.37  | 12.79  | 12.71  | 12.62       | 0.23       | 1.80   |
| 329.2323 | 111.18 | 0.87   | 0.90   | 0.89   | 0.89        | 0.01       | 1.51   |
| 329.2339 | 116.57 | 0.89   | 0.89   | 0.89   | 0.89        | 0.00       | 0.16   |
| 751.1885 | 99.55  | 1.97   | 1.97   | 2.00   | 1.98        | 0.02       | 0.82   |
| 331.0471 | 111.29 | 8.97   | 9.11   | 8.67   | 8.92        | 0.22       | 2.52   |
| 331.103  | 10.72  | 1.04   | 1.10   | 0.75   | 0.96        | 0.18       | 18.99  |
| 331.2432 | 114.16 | 0.31   | 0.50   | 0.40   | 0.41        | 0.09       | 23.22  |
| 333.0621 | 99.71  | 0.93   | 0.95   | 0.99   | 0.95        | 0.03       | 3.53   |
| 531.1162 | 106.41 | 1.02   | 1.10   | 1.06   | 1.06        | 0.04       | 3.50   |

**mz**: accurate mass to charge ratio; **rt**: retention time expressed in minutes;

**Mix\_R1, Mix\_R2, Mix\_R3**: median normalized instrumental response detected in the

**Average Mix, St. Dev. Mix, CV Mix**: descriptive stats calculated on the QC Mix replicates.

## Supplementary Information

Table S4: Extract of the XCMS Online result table

| featureidx | MSMS | fold | log2fold | tstat | pvalue | qvalue | updown | mzmed    | mzmin    | mzmax    | rtmed | rtmin | rtmax | maxint | Treatment1_mean | Treatment1_sd | Mix_mean | Mix_sd | isotopes     | adducts | pcgroup | name      | METLIN_MSMS |
|------------|------|------|----------|-------|--------|--------|--------|----------|----------|----------|-------|-------|-------|--------|-----------------|---------------|----------|--------|--------------|---------|---------|-----------|-------------|
| 4146       |      | 1.1  | 0.1      | 0.9   | 0.42   | 0.25   | UP     | 1185.719 | 1185.719 | 1185.736 | 0.20  | 0.20  | 0.24  | 1007   | 9548            | 1295          | 10453    | 1188   | [441][M+1]-  |         | 46      | M1186T0   | n           |
| 3782       |      | 1.1  | -0.2     | -1.1  | 0.33   | 0.21   | DOWN   | 1091.733 | 1091.732 | 1091.738 | 0.21  | 0.17  | 0.27  | 1080   | 12360           | 1193          | 11022    | 1666   |              |         | 46      | M1092T0_1 | n           |
| 2600       |      | 1.2  | -0.3     | -2.2  | 0.10   | 0.10   | DOWN   | 1033.725 | 1033.719 | 1033.725 | 0.22  | 0.20  | 0.27  | 1560   | 20283           | 1473          | 16938    | 2177   | [397][M+1]-  |         | 46      | M1034T0   | n           |
| 2830       |      | 1.2  | -0.2     | -1.9  | 0.14   | 0.12   | DOWN   | 1101.711 | 1101.706 | 1101.714 | 0.22  | 0.20  | 0.27  | 1193   | 15723           | 1176          | 13586    | 1559   | [419][M+1]-  |         | 46      | M1102T0   | n           |
| 2349       |      | 1.3  | -0.3     | -2.9  | 0.07   | 0.08   | DOWN   | 1058.738 | 1058.729 | 1058.747 | 0.22  | 0.20  | 0.24  | 1012   | 12503           | 569           | 9872     | 1442   | [406][M+1]2- |         | 46      | M1059T0   | n           |
| 2682       |      | 1.2  | -0.2     | -2.4  | 0.11   | 0.10   | DOWN   | 1169.693 | 1169.686 | 1169.699 | 0.22  | 0.21  | 0.24  | 798    | 10250           | 911           | 8909     | 334    | [435][M+1]-  |         | 46      | M1170T0   | n           |
| 4768       |      | 1.1  | -0.1     | -0.5  | 0.64   | 0.33   | DOWN   | 1236.692 | 1236.686 | 1236.698 | 0.22  | 0.21  | 0.24  | 840    | 9122            | 1952          | 8498     | 505    |              |         | 46      | M1237T0   | n           |
| 2882       |      | 1.3  | -0.3     | -1.8  | 0.14   | 0.12   | DOWN   | 966.7361 | 966.7326 | 966.7396 | 0.22  | 0.20  | 0.27  | 1296   | 15990           | 2033          | 12557    | 2524   | [365][M+2]-  |         | 46      | M967T0    | n           |
| 3197       |      | 1.3  | -0.4     | -1.8  | 0.20   | 0.15   | DOWN   | 1125.226 | 1125.223 | 1125.231 | 0.22  | 0.20  | 0.27  | 986    | 11459           | 385           | 8947     | 2342   | [426][M]2-   |         | 46      | M1125T0   | n           |
| 3252       |      | 1.2  | -0.3     | -1.6  | 0.21   | 0.16   | DOWN   | 899.7458 | 899.742  | 899.7459 | 0.22  | 0.20  | 0.27  | 1049   | 12983           | 1138          | 10554    | 2380   | [330][M+3]-  |         | 46      | M900T0    | n           |
| 2387       |      | 1.2  | -0.2     | -2.4  | 0.08   | 0.08   | DOWN   | 965.7359 | 965.7313 | 965.7419 | 0.23  | 0.20  | 0.27  | 1815   | 22875           | 1738          | 19359    | 1858   | [365][M+1]-  |         | 46      | M966T0    | n           |
| 2565       |      | 1.2  | -0.3     | -2.2  | 0.10   | 0.09   | DOWN   | 898.7486 | 898.7428 | 898.7544 | 0.23  | 0.20  | 0.27  | 1324   | 16247           | 1501          | 13342    | 1749   | [330][M+2]-  |         | 46      | M899T0    | n           |
| 3098       |      | 1.2  | -0.2     | -1.7  | 0.18   | 0.14   | DOWN   | 844.3024 | 844.299  | 844.3076 | 0.23  | 0.20  | 0.27  | 1466   | 16106           | 1922          | 13925    | 1141   | [305][M+1]2- |         | 46      | M844T0_2  | n           |
| 3811       |      | 1.1  | -0.1     | -1.1  | 0.34   | 0.22   | DOWN   | 198.9228 | 198.9222 | 198.9231 | 0.23  | 0.20  | 0.27  | 5336   | 78852           | 5928          | 74240    | 4022   |              |         | 46      | M199T0    | n           |
| 3877       |      | 1.1  | -0.1     | -1.2  | 0.35   | 0.22   | DOWN   | 1151.24  | 1151.23  | 1151.241 | 0.23  | 0.20  | 0.27  | 1259   | 12771           | 1401          | 11788    | 307    | [430][M+3]2- |         | 46      | M1151T0_2 | n           |
| 1782       |      | 1.2  | 0.3      | 3.3   | 0.03   | 0.04   | UP     | 1320.697 | 1320.692 | 1320.71  | 0.23  | 0.17  | 0.27  | 1085   | 9998            | 773           | 12185    | 831    |              |         | 46      | M1321T0   | n           |
| 2198       |      | 1.1  | -0.2     | -2.8  | 0.06   | 0.06   | DOWN   | 949.7883 | 949.7851 | 949.7895 | 0.23  | 0.20  | 0.27  | 992    | 11135           | 467           | 9777     | 702    | [356][M+4]-  |         | 46      | M950T0    | n           |
| 3287       |      | 1.1  | 0.2      | 1.5   | 0.22   | 0.17   | UP     | 998.8158 | 998.8069 | 998.8195 | 0.23  | 0.20  | 0.27  | 1103   | 10289           | 1297          | 11669    | 993    | [382][M+2]-  |         | 46      | M999T0    | n           |
| 3649       |      | 1.1  | 0.1      | 1.3   | 0.30   | 0.20   | UP     | 1065.305 | 1065.304 | 1065.309 | 0.23  | 0.20  | 0.27  | 1285   | 11402           | 1494          | 12599    | 363    |              |         | 46      | M1065T0_2 | n           |
| 3925       |      | 1.1  | -0.2     | -1.0  | 0.36   | 0.22   | DOWN   | 1084.253 | 1084.248 | 1084.255 | 0.23  | 0.20  | 0.27  | 1096   | 11651           | 1502          | 10199    | 1891   | [413][M+5]2- |         | 46      | M1084T0_2 | n           |
| 4230       |      | 1.1  | -0.1     | -0.8  | 0.45   | 0.26   | DOWN   | 1185.232 | 1185.223 | 1185.239 | 0.23  | 0.20  | 0.27  | 1158   | 11911           | 1634          | 10912    | 1230   |              |         | 46      | M1185T0_2 | n           |
| 4300       |      | 1.1  | 0.2      | 0.8   | 0.47   | 0.27   | UP     | 1336.729 | 1336.722 | 1336.74  | 0.23  | 0.20  | 0.27  | 1223   | 10378           | 2332          | 11850    | 2160   |              |         | 46      | M1337T0   | n           |
| 4556       |      | 1.1  | -0.1     | -0.6  | 0.56   | 0.30   | DOWN   | 1150.241 | 1150.24  | 1150.246 | 0.23  | 0.20  | 0.27  | 1171   | 11443           | 1764          | 10605    | 1425   | [430][M+1]2- |         | 46      | M1150T0_2 | n           |
| 4878       |      | 1.0  | 0.0      | -0.5  | 0.68   | 0.34   | DOWN   | 845.7979 | 845.7978 | 845.8048 | 0.23  | 0.20  | 0.27  | 1205   | 13443           | 137           | 13032    | 1498   | [305][M+4]2- |         | 46      | M846T0_1  | n           |
| 5351       |      | 1.0  | 0.0      | -0.2  | 0.88   | 0.40   | DOWN   | 1302.728 | 1302.72  | 1302.735 | 0.23  | 0.19  | 0.27  | 1126   | 10297           | 1224          | 9975     | 3122   |              |         | 46      | M1303T0   | n           |
| 5421       |      | 1.0  | 0.0      | -0.1  | 0.91   | 0.41   | DOWN   | 1142.766 | 1142.761 | 1142.769 | 0.23  | 0.20  | 0.27  | 1191   | 10543           | 2607          | 10340    | 768    | [428][M+1]2- |         | 46      | M1143T0   | n           |
| 2897       |      | 1.1  | -0.2     | -1.8  | 0.15   | 0.12   | DOWN   | 897.75   | 897.745  | 897.752  | 0.23  | 0.20  | 0.27  | 1804   | 22395           | 1799          | 19658    | 1915   | [330][M+1]-  |         | 46      | M898T0    | n           |
| 3771       |      | 1.1  | -0.2     | -1.1  | 0.32   | 0.21   | DOWN   | 829.7597 | 829.7589 | 829.7605 | 0.23  | 0.20  | 0.27  | 1737   | 22214           | 2985          | 19661    | 2550   | [303][M+1]-  |         | 46      | M830T0    | n           |
| 5653       |      | 1.0  | 0.0      | 0.0   | 1.00   | 0.43   | UP     | 813.8131 | 813.8077 | 813.8163 | 0.23  | 0.20  | 0.27  | 1018   | 11388           | 1375          | 11390    | 1366   | [296][M+4]-  |         | 46      | M814T0    | n           |
| 2178       |      | 1.5  | -0.5     | -2.9  | 0.06   | 0.06   | DOWN   | 990.7538 | 990.7503 | 990.757  | 0.23  | 0.20  | 0.24  | 1071   | 12870           | 1301          | 8859     | 2052   | [380][M+1]2- |         | 46      | M991T0    | n           |
| 4607       |      | 1.1  | -0.2     | -0.6  | 0.58   | 0.31   | DOWN   | 913.7849 | 913.7755 | 913.7857 | 0.23  | 0.21  | 0.27  | 1634   | 17062           | 4159          | 15353    | 2341   | [337][M+4]2- |         | 46      | M914T0_1  | n           |

**featureidx:** feature identifier number; **MSMS:** ms/ms data, **fold** and **log2 fold:** foldchange and log2 fold change, **p-value, q value:** t test parameters, **updown:** whether the feature is up or down regulated, **mzmed:** average accurate mass to charge ratio, **mzmin:** minimum m/z observed for the feature across the dataset, **mzmax:** max m/z observed for the feature across the dataset **rt:** average retention time expressed in minutes, **rtmin:** minimum rt observed for the feature across the dataset, **rtmax:** maximum rt observed for the feature across the dataset, **npeaks:** number of peaks observed for a given feature in the dataset, **isotopes:** isotopes found in the pseudospectrum, **adducts:** adducts presents, **pcgroup:** id of the pseudospectra groups, **RespMed:** average response across the dataset.

**Treatment1\_mean, Mix\_mean, Mix\_sd:** respectively, average instrumental response and standard deviation for the 2 sample classes considered. **Isotopes:** isotopes found in the pseudospectrum, **adducts** presents, **pcgroup:** id of the pseudospectra groups, **name:** entry identifier for Metlin library match, **METLIN\_MSMS:** whether ms/ms library entries were used

## Supplementary Information

Figure S1: MStractor workflow, sequence of functions with arguments

```
# Load library
library(MStractor)

# Acquisition parameters
Project()
LoadData()
DefineClassAttributes(ClassType)
ChromParam()
MassSpecParam()
PeakPickingParam()

#Explore reference files
exploreRefs()
refTic(x_refs)
get100(x_refs)

#Perfrom peak picking
peakPickGroup()

#Print raw EICs and TICs
OverlaidTICs(xdata, 'raw')
printEICs(xdata, 'raw')

#Retention time alignment
RTalign(xdata, 'loess')
OverlaidTICs(xdata, 'aligned')
pdp <- PeakDensityParam(sampleGroups = xdata$sample_group, minFraction =
0.3, bw = 20)
xdata <- groupChromPeaks(xdata, param = pdp)
xfilled <- fillChromPeaks(xdata, param = (FillChromPeaksParam(ppm = 10,
expandMz = 0.5)))

#Print aligned EICs and TICs
OverlaidTICs(xdata, 'aligned')
printEICs(xfilled, 'filled')

#Create summary datamatrix
CreateDM(xfilled, 'maxo')
xsetConvert(xfilled)
samprnames(xset)<-spn

#CAMERA
autoCamera(xsFilled)
FilterDM(PksAn, xset)
CollectBP_EICs(BasePks)
BasePks_Curated(BasePks)

#Descriptive statistics and data visualization
MedianNormalize(BasePksCur)
StatsByClass(ClassType)
bpSel()
Boxplot(NormalizedMatrix, bpSelection, "linear")

#Create spectra list for library search
storeRefFeat()
spectraFromScan(RefFeat)
nistEntryFromScan(spectralist, RefFeatScan)
createSearchList("spectralist")
```

Figure S2: MStractor GUI used for entering integration threshold value

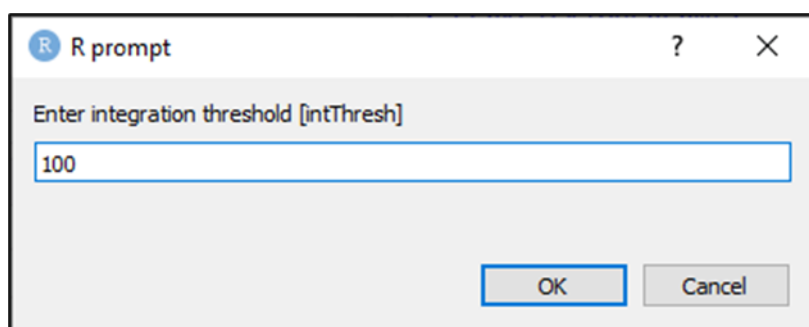

Supplement: s1 [file s1]
